# Supplementary material
Source: publisher site journal article supplement (https://www.e-cmh.org/upload/media/cmh-2023-0131-Supplementary-Table-3.pdf)
Supplement: Supplementary file 1 [file cmh-2023-0131-Supplementary-Table-3.pdf]

**Supplementary Table 3.** Major adverse events in 16 randomized controlled studies

| Study name (Country)                          | Arm      | No. of patients | Major complications (%)* | Major complication events                                                      |
|-----------------------------------------------|----------|-----------------|--------------------------|--------------------------------------------------------------------------------|
| Abdelaziz et al. <sup>23</sup> 2014 (Egypt)   | RFA      | 45              | ND                       | ND                                                                             |
|                                               | MWA      | 66              | ND                       | ND                                                                             |
| Brunello et al. <sup>24</sup> 2008 (Italy)    | PEI      | 69              | 2.9                      | Death caused by bowel infarct (n=1),                                           |
|                                               | RFA      | 70              | 2.9                      | Hemoperitoneum (n=1),<br>hemothorax (n=1)                                      |
| Chong et al. <sup>25</sup> 2020 (Hong Kong)   | MWA      | 47              | ND                       | ND                                                                             |
|                                               | RFA      | 46              | ND                       | ND                                                                             |
| Di Costanzo et al. <sup>26</sup> 2015 (Italy) | RFA      | 70              | 1.4                      | Subcutaneous tumor seeding (n=1)                                               |
|                                               | LA       | 70              | 1.4                      | Subcutaneous tumor seeding (n=1)                                               |
| Giorgio et al. <sup>27</sup> 2011 (Italy)     | PEI      | 143             | ND                       | ND                                                                             |
|                                               | RFA      | 142             | ND                       | ND                                                                             |
| Kim et al. <sup>8</sup> 2021 (South Korea)    | PBT      | 72              | 0                        | None                                                                           |
|                                               | RFA      | 72              | 1.4                      | Bleeding in the inferior phrenic artery (n=1)                                  |
| Koda et al. <sup>36</sup> 2001 (Japan)        | TACE+PEI | 26              | 7.7                      | Biloma (n=1),<br>ascites with pleural effusion (n=1)                           |
|                                               | PEI      | 26              | 0                        | None                                                                           |
| Lencioni et al. <sup>6</sup> 2003 (Italy)     | RFA      | 52              | 0                        | None                                                                           |
|                                               | PEI      | 50              | 0                        | None                                                                           |
| Lin et al. <sup>28</sup> 2004 (Taiwan)        | RFA      | 52              | 0                        | None                                                                           |
|                                               | PEI      | 52              | 0                        | None                                                                           |
| Lin et al. <sup>29</sup> 2005 (Taiwan)        | RFA      | 62              | 4.8                      | Hemothorax (n=2),<br>gastric bleeding and perforation (n=1)                    |
|                                               | PEI      | 62              | 0                        | None                                                                           |
|                                               | PAI      | 63              | 0                        | None                                                                           |
| Mizuki et al. <sup>37</sup> 2010 (Japan)      | PEI      | 14              | 0                        | None                                                                           |
|                                               | TACE+PEI | 13              | 0                        | None                                                                           |
| Paul et al. <sup>30</sup> 2020 (India)        | PAI      | 26              | 7.7                      | Death caused by hepatic necrosis (n=1),<br>death caused by tumor rupture (n=1) |
|                                               | RFA      | 29              | 6.9                      | Hydropneumothorax (n=2),<br>hemoperitoneum (n=1)                               |

Supplementary Table 3. Continued

| Study name (Country)                                            | Arm      | No. of patients | Major complications (%) <sup>*</sup> | Major complication events                                                                                                                                       |
|-----------------------------------------------------------------|----------|-----------------|--------------------------------------|-----------------------------------------------------------------------------------------------------------------------------------------------------------------|
| Peng et al. <sup>31</sup> 2012 (China)                          | TACE+RFA | 69              | 2.9                                  | Moderate ascites (n=1),<br>liver failure (n=1)                                                                                                                  |
|                                                                 | RFA      | 70              | 2.9                                  | Severe ascites (n=1),<br>persistent jaundice (n=1)                                                                                                              |
| Shibata et al. <sup>32</sup> 2009 (Japan)                       | TACE+RFA | 46              | 2.2                                  | Segmental hepatic infarct (n=1)                                                                                                                                 |
|                                                                 | RFA      | 43              | 2.3                                  | Pseudoaneurysm of hepatic artery (n=1)                                                                                                                          |
| Shiina et al. <sup>33</sup> 2005 (Japan)                        | RFA      | 118             | 3.4                                  | Transient jaundice (n=1),<br>skin burn (n=1),<br>hepatic infarction (n=1),<br>seeding of malignant cells (n=3)                                                  |
|                                                                 | PEI      | 114             | 2.6                                  | Liver abscess (n=1),<br>neoplastic seeding (n=2)                                                                                                                |
| Tsai et al. <sup>38</sup> 2008 (Taiwan)                         | PAI      | 70              | 1.4                                  | Gross hematuria (n=1)                                                                                                                                           |
|                                                                 | PEI      | 55              | 0                                    | None                                                                                                                                                            |
| Viotti Violi et al. <sup>34</sup> 2018 (France and Switzerland) | MWA      | 71              | 2.8                                  | Arterial bleeding (n=2)                                                                                                                                         |
|                                                                 | RFA      | 73              | 4.1                                  | Pneumothorax (n=1),<br>lesion of the umbilical vein (n=1),<br>intrahepatic segmental necrosis                                                                   |
| Wang et al. <sup>10</sup> 2015 (China)                          | CA       | 180             | 3.9                                  | Peritoneal hemorrhage (n=2), symptomatic pleural effusion (n=1), septicemia (n=1),<br>hemopneumothorax (n=1),<br>pneumothorax (n=1),<br>worsened jaundice (n=1) |
|                                                                 | RFA      | 180             | 3.3                                  | Septicemia (n=2),<br>peritoneal hemorrhage (n=1), symptomatic pleural effusion (n=1), intrahepatic abscess (n=1),<br>worsened ascites (n=1).                    |
| Zaitoun et al. <sup>35</sup> 2021 (Egypt)                       | TACE     | 84              | 3.6                                  | Severe hepatic dysfunction (n=3)                                                                                                                                |
|                                                                 | MWA      | 92              | 2.2                                  | Tumor seeding (n=2)                                                                                                                                             |
|                                                                 | TACE+MWA | 89              | 1.1                                  | Severe hepatic dysfunction (n=1)                                                                                                                                |

RFA, radiofrequency ablation; MWA, microwave ablation; PEI, percutaneous ethanol injection; LA, laser ablation; TACE, trans-arterial chemoembolization; PBT, proton beam therapy; PAI, percutaneous acetic acid injections; CA, cryoablation; ND, not described.

<sup>\*</sup>Results for major complications were based on the criteria defined and set by the individual studies. Information corresponding to the reference number listed in Supplementary Table 3 is available in the References for main manuscript.
